# Supplementary material for: Sandwich-like nitrogen-doped porous carbon/graphene nanoflakes with high-rate capacitive performance
Source: Royal Society of Chemistry journal article supplement (doi:10.1039/c5nr05151g), 2015-11-30
Supplement: c5nr05151g1.pdf [file c5nr05151g1.pdf]

## Supporting Information

---

### **Sandwich-like Nitrogen-Doped Porous Carbon/Graphene Nanoflakes with High-rate Capacitive Performance**

Yu Zhang,<sup>a,†</sup> Binglin Tao,<sup>b,†</sup> Wei Xing,<sup>\*,a,b</sup> Lei Zhang,<sup>c</sup> Qingzhong Xue,<sup>a</sup> and Zifeng Yan<sup>\*,b</sup>

<sup>a</sup>School of Science, China University of Petroleum, Qingdao 266580, P. R. China. Tel./Fax: (+) 86

532 86983579; E-mail: xingwei@upc.edu.cn;

<sup>b</sup>State Key Laboratory of Heavy Oil Processing, Key Laboratory of Catalysis, CNPC, China

University of Petroleum, Qingdao 266580, P. R. China. E-mail: zfyancat@upc.edu.cn;

<sup>c</sup>School of Chemical Engineering, University of Adelaide, Adelaide SA 5005, Australia.

<sup>†</sup>Y. Zhang and B. L. Tao contributed equally to this work.

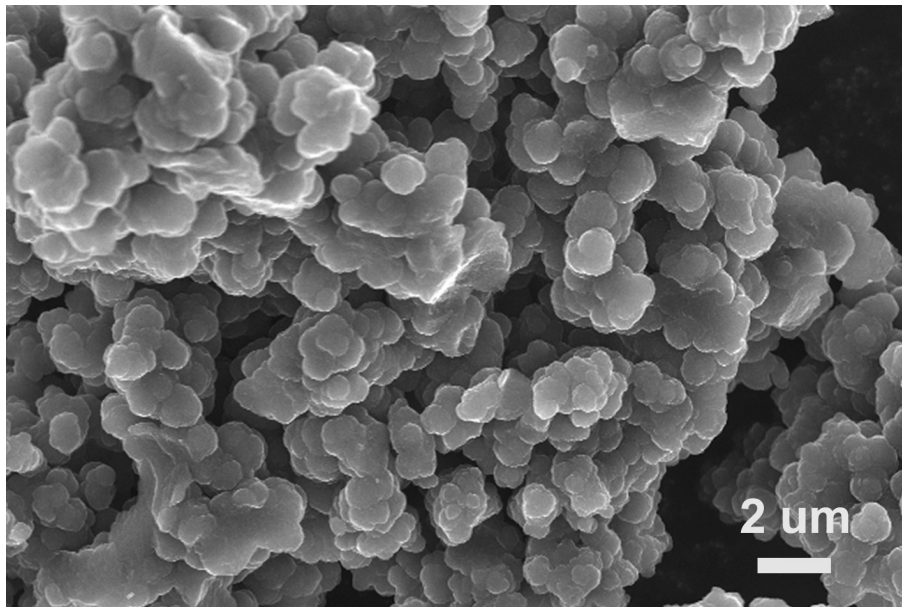

Fig. S1. FESEM image of pure PPy.

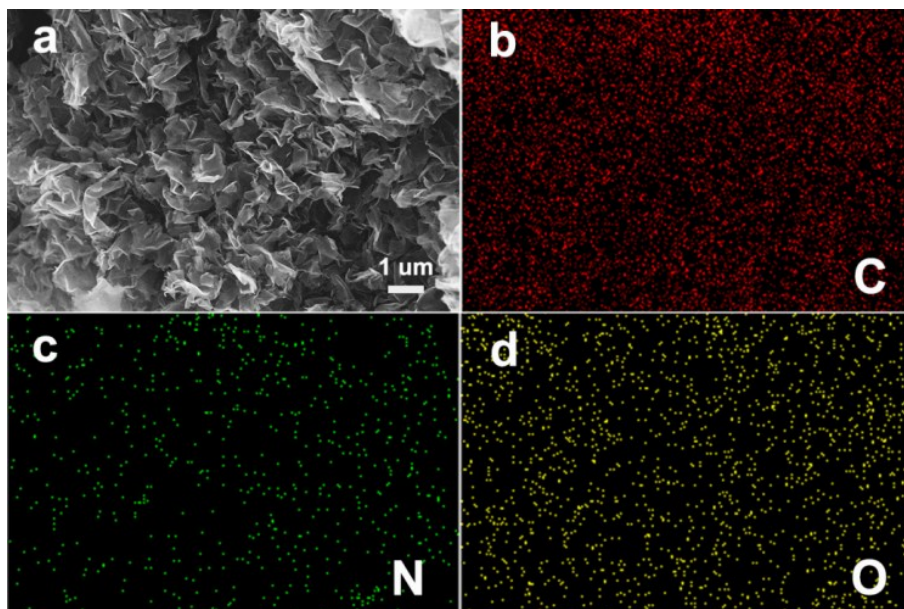

Fig. S2. (a) Selected area for elemental mapping of NPCFs-2 sample and (b), (c), (d) Elemental mappings of C, N and O.

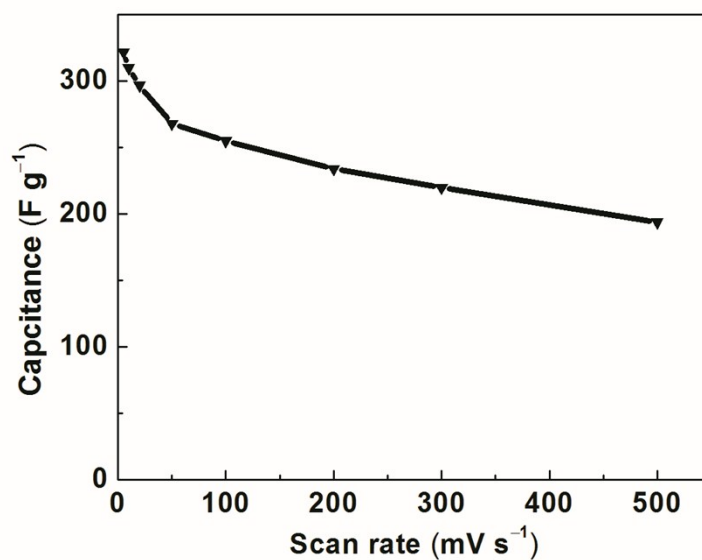

Fig. S3. Specific capacitance of NPCFs-2 at various scan rates from 5 to 500 mV s<sup>-1</sup>.

Specific capacitance was obtained from the CV curves according to the following equation:

$$C_{sp} = \frac{\oint I dv}{vm\Delta v}$$

where  $I$  is the response current (A),  $m$  is the total mass of electrodes (g),  $\Delta v$  is the potential range (V),

and  $v$  is the scan rate (mV s<sup>-1</sup>).

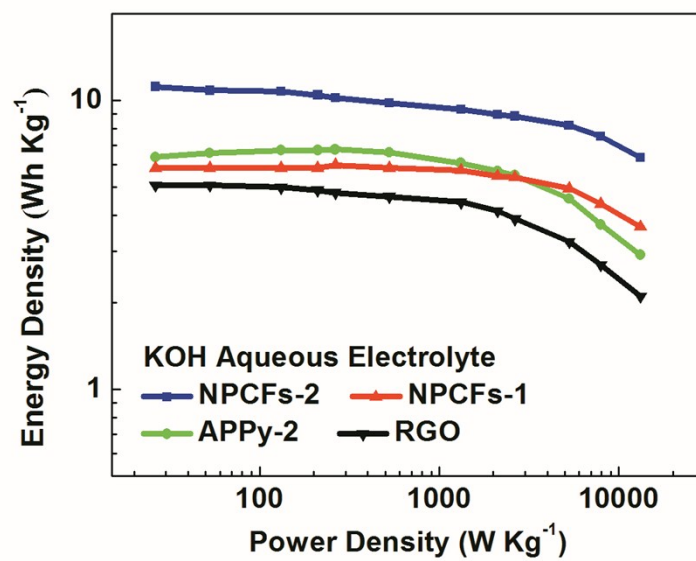

Fig. S4. Ragone plots of RGO, NPCFs-1, NPCFs-2, and APPy-2 supercapacitors in 30 wt% KOH aqueous electrolyte.

Table S1 The relative contents of N-containing functional groups in NPCFs-1 and NPCFs-2.

| Samples | Content of different N groups (%) |      |     |     |
|---------|-----------------------------------|------|-----|-----|
|         | N-6                               | N-5  | N-Q | N-4 |
| NPCFs-1 | 44                                | 53.8 | 0   | 2.2 |
| NPCFs-2 | 48.5                              | 42.1 | 3.1 | 6.3 |

Table S2. Comparison of capacitive performance of NPCFs-2 with other carbon electrodes reported in aqueous electrolyte

| Carbon materials             | Testing method | C <sup>a</sup> (F g <sup>-1</sup> ) | C <sup>b</sup> (F g <sup>-1</sup> ) | Electrolyte (mol L <sup>-1</sup> )  | Ref.      |
|------------------------------|----------------|-------------------------------------|-------------------------------------|-------------------------------------|-----------|
| microporous carbon           | GCD            | 254 (0.5 A g <sup>-1</sup> )        | 140 (30 A g <sup>-1</sup> )         | H <sub>2</sub> SO <sub>4</sub> (1)  | [1]       |
| 3D porous graphene           | GCD            | 206 (2 A g <sup>-1</sup> )          | 185 (15 A g <sup>-1</sup> )         | H <sub>2</sub> SO <sub>4</sub> (1)  | [2]       |
| graphene aerogel             | GCD            | 204 (0.2 A g <sup>-1</sup> )        | 140 (30 A g <sup>-1</sup> )         | KOH (6)                             | [3]       |
| hierarchically porous carbon | GCD            | 238 (0.2 A g <sup>-1</sup> )        | 178 (30 A g <sup>-1</sup> )         | KOH (6)                             | [4]       |
| hierarchically porous carbon | CV             | 239 (5 mV s <sup>-1</sup> )         | 166 (100 mV s <sup>-1</sup> )       | H <sub>2</sub> SO <sub>4</sub> (1)  | [5]       |
| microporous carbon fibers    | GCD            | 215 (0.2 A g <sup>-1</sup> )        | 113 (100 A g <sup>-1</sup> )        | KOH (6)                             | [6]       |
| MOF-derived carbon           | CV             | 252 (5 mV s <sup>-1</sup> )         | 159 (200 mV s <sup>-1</sup> )       | H <sub>2</sub> SO <sub>4</sub> (1)  | [7]       |
| MOF-derived carbon           | GCD            | 251 (0.25 A g <sup>-1</sup> )       | 204 (0.5 A g <sup>-1</sup> )        | H <sub>2</sub> SO <sub>4</sub> (1)  | [8]       |
| porous carbon                | GCD            | 245 (0.05 A g <sup>-1</sup> )       | 188 (8 A g <sup>-1</sup> )          | KOH (6)                             | [9]       |
| porous carbon                | GCD            | 300 (0.1 A g <sup>-1</sup> )        | 228 (8 A g <sup>-1</sup> )          | Na <sub>2</sub> SO <sub>4</sub> (1) | [10]      |
| NPCFs-2                      | GCD            | 341 (0.1 A g <sup>-1</sup> )        | 220 (30 A g <sup>-1</sup> )         | KOH (6)                             | This work |

<sup>a</sup> Specific capacitance at low current density or voltage scan rate

<sup>b</sup> Specific capacitance at high current density or voltage scan rate

## Reference

1. D. Puthusseri, V. Aravindan, S. Madhavi and S. Ogale, *Energy Environ. Sci.*, 2014, **7**, 728-735.
2. T. T. Li, N. Li, J. W. Liu, K. Cai, M. F. Foda, X. M. Lei and H. Y. Han, *Nanoscale*, 2015, **7**, 659-669.
3. X. X. Sun, P. Cheng, H. J. Wang, H. Xu, L. Q. Dang, Z. H. Liu and Z. B. Lei, *Carbon*, 2015, **92**, 1-10.
4. P. Cheng, S. Y. Gao, P. Y. Zang, X. F. Yang, Y. L. Bai, H. Xu, Z. H. Liu and Z. B. Lei, *Carbon*, 2015, **93**, 315-324.
5. J. W. Jeon, R. Sharma, P. Meduri, B. W. Arey, H. T. Schaefer, J. L. Lutkenhaus, J. P. Lemmon, P. K. Thallapally, M. I. Nandasiri and B. P. McGrail, *ACS Appl. Mater. Inter.*, 2014, **6**, 7214-7222.
6. T. Le, Y. Yang, Z. H. Huang and F. Y. Kang, *J. Power Sources*, 2015, **278**, 683-692.
7. R. R. Salunkhe, Y. Kamachi, N. L. Torad, S. M. Hwang, Z. Sun, S. X. Dou, J. H. Kim and Y. Yamauchi, *J. Mater. Chem. A*, 2014, **2**, 19848-19854.
8. A. J. Amali, J. K. Sun and Q. Xu, *Chem. Commun.*, 2014, **50**, 1519-1522.
9. B. Xu, D. F. Zheng, M. Q. Jia, G. P. Cao and Y. S. Yang, *Electrochim. Acta*, 2013, **98**, 176-182.
10. X. M. Fan, C. Yu, J. Yang, Z. Ling and J. S. Qiu, *Carbon*, 2014, **70**, 130-141.
